# Supplementary material
Source: publisher figshare collection journal article supplement (https://f1000.figshare.com/ndownloader/files/1450055)
Supplement: Supplementary file 1 [file 1450055]

Cases	Diagnosis	Plaques pathology	Tangles pathology	Lewy bodies pathology	Dynamin1 (ng/mg total prot)	Total CaMKII (arbitrary units)	pCaMKII (arbritary units)	Ratio P/tot CaMKII (arbitrary units)
	(groups)	(semi-quantitative Abeta scores)	(semi-quantitative pTau scores)	(semi-quantitative alpha-synuclein scores)	(ELISA measurements)	Western blotting quantification	Western blotting quantification	Western blotting quantification
1	control	0	0	0	2.79	0.75	0.76	0.4
2	control	0	0	0	1.85	0.86	0.64	0.1
3	control	0	0	0	1.97	1.25	2.87	2.08
4	control	0	0	0	1.82	0.94	2.78	2.9
5	control	0	1	0	2.02	0.79	2.71	2.81
6	control				3.66	0.84	1.46	1.74
7	control	0	0	0	1.85	1.39	4.53	2.98
8	control	2	0	0	3.08	1.7	4.87	2.19
9	control	0	0	0	1.32	1.39	3.86	2.5
10	control	0	0	0		1.07	3.77	2.86
11	control	1	0	0	1.51	0.54	2.72
12	control	0	0	0	4.01	0.18	0.48	2.37
13	control	0	0	0	5.67	0.69	2.02	3.1
14	control	1	1	0	3.38	0.82	2.31	2.17
15	control	0	0	0	1.54	1.03	1.17	1
16	control	1	0	0	6.54	1.51	3.75	2.18
17	control	0	0	0	6.27	1.52	3.3	1.84
18	control	2	1	0	3.58	1.3	2.47	1.64
19	control				2.22	1.05	4.41	4.05
20	control	0	0	0	3.3	0.8	3.8	4.11
21	control	1	0	0	1.83	0.96	3.13	3.17
22	control	0	0	0	2.43	1.49	2.55	1.04
23	control	0	1	0	0.89	0.74	2.72	3.79
24	control	0	0	0
25	control	0	0	0	5.25	1	3	2.33
26	PDD	0		1	1.32	0.85	1.58	1.87
27	PDD	1	0	1	0.56	0.77	3.8	4.31
28	PDD	3	1	2	1.5	0.7	2.2	2.53
29	PDD	2	0	1
30	PDD	2	1	2	0.32	1.01	0.64	0.53
31	PDD	3	1	1	1.54	1.2	0.24	0
32	PDD	2	0	1	2.23	0.28	1.28
33	PDD	2	2	1	2.44	0.33	1.56
34	PDD	1	1	1	2.54	0.6	1.25	2.41
35	PDD	0	1	2	1.59	0.91	1.52	1.64
36	PDD	1	1	0	1.33	0.85	3.05	2.95
37	PDD	3	1	1	0.72	1.31	1.23	0.27
38	PDD	0	1	0	4.7	0.58	1.45	2.85
39	PDD	1	0	1	4.55	0.75	1.53	2.15
40	PDD	3	1	2		0.82	2.13	1.96
41	PDD	1	0	0	3.7	0.92	1.88	2
42	PDD	1	0	1	1.4	0.42	0.93	2.98
43	PDD	0	0	0	4.11	0.33	1.49	4.03
44	PDD	0	1	0	5.07	0.68	2.29	2.75
45	PDD	1	0	1	4.87	0.82	2.38	2.27
46	PDD	0	1	1	0.76	0.54	1.49	3.19
47	PDD	0	0	0	5.51	0.21	0.91	3.98
48	PDD	0	0	0	5.07	0.89	2.23	2.48
49	PDD	2	0	0	1.53	0.67	1.91	3.06
50	PDD	3	0	0	5.64	0.44	1.3	3.65
51	PDD	1	0	0	3.3
52	PDD	2	1	2	5.34	1.03	2.04	1.33
53	PDD	3	0	0	4.88	0.52	1.27	1.87
54	PDD	3	1	0	9.65	0.93	2.74	2.3
55	PDD	3	0	1		0.4	2.55	5.84
56	PDD	2	1	3	5.3	0.49	2.13	4.9
57	PDD			0		0.53	1.8	2.82
58	PDD	0	0	1	5.96	0.25	0.77	2.67
59	PDD	0	1	0	6	0.68	0.98	1.64
60	DLB	2	1	0	4.55	0.95	3.42	2.93
61	DLB	3	1	2
62	DLB	3	3	1	2.5	0.83	1.94	2.34
63	DLB	1	0	2	4.8	0.97	2.48	2.46
64	DLB	1	1	1	4.04	0.66	1.86	3.03
65	DLB	2	1	0		1.14	2.8	1.79
66	DLB		0	3	1.73	1.18	1.57	0.67
67	DLB	3	0	2	0.01	0.85	1.51	1.79
68	DLB		3		4.09	0.85	2.38	2.17
69	DLB	2	1	2	3.48	0.97	2.01	1.99
70	DLB	2	2	1	3.07	0.95	2.26	1.74
71	DLB	0	2	2	3.72	0.75	2.13	2.22
72	DLB	2	1	1	2.2
73	DLB	2	1	1	3.65	1.25	1.75	1.18
74	DLB	2	1	2	2.86	0.81	2.19	2.76
75	DLB	2	2	2	2.21	1.3	3.58	2.09
76	DLB	0	0	1		0.84	2.65	3.19
77	DLB	3	2	0	5.91	1.21	2.46	1.38
78	DLB	1	0	0	4.2	0.87	2.93	2.74
79	DLB	1	0	0	4.62	1.17	2.89	1.8
80	DLB	0	0	1	5.3	1.03	2.69	2.49
81	DLB	1	1	3	3.14	1.1	3.43	2.95
82	DLB	3	1	1	4.55	0.75	2.3	3.17
83	DLB	1	0	0	1.57	0.93	2.69	2.24
84	DLB	2	1	1	2.57	1.04	2.57	2.34
85	DLB	3	1	1	2.45	0.93	1.24	1.28
86	DLB	0	0	2	0.75	0.91	2.59	2.21
87	DLB	3	3	3	2.69	1.2	4.53	3.58
88	DLB	1	1	2		0.73	2.83	2.11
89	DLB	3	1	3	5.71	0.86	3.23	3.13
90	DLB	2	1	3	3.05	0.87	2.83	2.63
91	DLB	2	0	2		1.15	4.25	3.52
92	DLB	3	1	0	3.39	0.76	2.57	3.49
93	DLB	3	2	3		1.08	3.41	2.51
94	DLB	1	1	1	2.52	0.85	2.82	2.69
95	DLB	2	1	2		0.97	4	3.49
96	DLB	3	1	3		0.91	2.22	2.41
97	DLB	2	1	3	1.1	1.28	2.7	1.87
98	DLB	3	1	1
99	DLB	3	0	1
100	DLB	0	1	3	1.24	1	4.36	4.26
101	DLB	1	1	3	2.9	0.99	4.75	4.16
102	DLB	0	0	2	3.89	1.63	3.96	2.09
103	DLB	0	1	3		1	2.65	2.55
104	DLB	2	1			0.39	0.9	1.79
105	DLB	1	0	2
106	DLB	3	0	2	5.08	1.23	2.27	1.63
107	DLB	1	1	3	3.84	1.35	3.14	1.66
108	DLB	1	0	0	3.33	1.29	2.13	1.42
109	DLB	1	1	3	0.06	0.43	0.29	1.4
110	DLB	0	0	1	5.13	0.77	2.24	2.99
111	DLB	1	1		4.62	1.31	3.04	2.07
112	DLB	2	1	2	5.2	1.3	2.85	1.95
113	DLB	0	0	0		0.73	2.85	3.29
114	DLB	3	3	1	5.74	0.76	1.07	0.79
115	AD	3	3	0	2.99	0.77	2.38	3.19
116	AD	3	2	0	1.78	0.53	0.41	0.21
117	AD	3	3	0	3.21	0.72	0.62	0.25
118	AD	3	3	1	6.69	0.65	0.55	0.25
119	AD	3	3	0	7.35	1.01	2.69	2.02
120	AD	3	3	0	1.05	1.06	2.14	1.38
121	AD	3	2	0	1.24	0.82	2.85	2.85
122	AD	1	2	0	2.08	1.19	1.71	0.79
123	AD	3	2	0	1.74	0.97	2.33	2.33
124	AD	3	2	0	2.74	0.57	-0.05	0.3
125	AD	3	3	0	2.77	0.95	1.83	1.3
126	AD	3	2	0	1.53	0.63	0.6	0.36
127	AD	3	3	0	4.59	0.66	0.52	0.19
128	AD	3	3	1	4.85	0.6	0.01	0.35
129	AD	3	2	0	3.48	0.73	0.53	0.12
130	AD	2	3	0	5.27	1.02	3.02	2.86
